# Supplementary material for: Are Personal Health Records Safe? A Review of Free Web-Accessible Personal Health Record Privacy Policies
Source: PubMed Central journal article supplement (PMC3510685; doi:10.2196/jmir.1904), 2012-08-23
Supplement: jmir_v14i4e114_app2.pdf [file jmir_v14i4e114_app2.pdf]

## Multimedia Appendix 2. List of PHRs excluded and included in the study

**Table 7: List of PHRs included and discarded in the review**

|           | <b>PHR</b>                             | <b>Source</b>                               | <b>Discard Criteria</b> |
|-----------|----------------------------------------|---------------------------------------------|-------------------------|
| <b>1</b>  | Medefile                               | ScienceDirect                               | IC1                     |
| <b>2</b>  | RelayHealth                            | ScienceDirect, ACM Digital Library          | IC1                     |
| <b>3</b>  | LifeSensor                             | ScienceDirect                               | IC1                     |
| <b>4</b>  | IQHealth                               | ScienceDirect                               | IC1                     |
| <b>5</b>  | CapMed icePHR Mobile                   | ScienceDirect, ACM Digital Library          | IC1                     |
| <b>6</b>  | MyMedicalRecords.com                   | ScienceDirect                               | IC1                     |
| <b>7</b>  | SecureMed                              | Medline                                     | IC1                     |
| <b>8</b>  | My Health                              | ScienceDirect                               | IC1                     |
| <b>9</b>  | Dossia                                 | ScienceDirect, Medline, ACM Digital Library | IC1                     |
| <b>10</b> | Lynxcare                               | ScienceDirect                               | IC1                     |
| <b>11</b> | AboutMyHealth                          | ScienceDirect                               | IC3                     |
| <b>12</b> | MyMediList                             | myPHR.com                                   | IC3                     |
| <b>13</b> | ItRunsInMyFamily                       | myPHR.com                                   | IC3                     |
| <b>14</b> | WorldMedcard                           | ACM Digital Library                         | IC3                     |
| <b>15</b> | Patient Power                          | myPHR.com                                   | IC1                     |
| <b>16</b> | Compiling Your Family Health History   | myPHR.com                                   | IC2                     |
| <b>17</b> | Powerful Patient Solutions, Inc.       | myPHR.com                                   | IC2                     |
| <b>18</b> | MyPRO Medical-Health Records Organizer | myPHR.com                                   | IC2                     |
| <b>19</b> | Jakoter Health Organizer               | myPHR.com                                   | IC2                     |
| <b>20</b> | HealthTracks                           | myPHR.com                                   | IC2                     |
| <b>21</b> | So Tell Me Medical Organizer           | myPHR.com                                   | IC2                     |
| <b>22</b> | Organized Solutions                    | myPHR.com                                   | IC2                     |
| <b>23</b> | My Vital Data                          | myPHR.com                                   | IC2                     |
| <b>24</b> | People Chart                           | myPHR.com                                   | IC2                     |
| <b>25</b> | HealthNote                             | myPHR.com                                   | IC2                     |
| <b>26</b> | My Personal Guardian                   | myPHR.com                                   | IC2                     |
| <b>27</b> | Personal Medical Records               | myPHR.com                                   | IC2                     |

|           |                       |                                                                                       |          |
|-----------|-----------------------|---------------------------------------------------------------------------------------|----------|
| <b>28</b> | Merck Source          | ScienceDirect                                                                         | IC2      |
| <b>29</b> | VIA                   | myPHR.com                                                                             | Included |
| <b>30</b> | My Doclopedia PHR     | ACM Digital Library,<br>myPHR.com                                                     | Included |
| <b>31</b> | Dr. I-Net             | ACM Digital Library,<br>myPHR.com                                                     | Included |
| <b>32</b> | EMRy STICK            | ScienceDirect,<br>ACM Digital Library,<br>myPHR.com                                   | Included |
| <b>33</b> | Google Health         | ScienceDirect,<br>MedLine, ACM Digital Library,<br>IEEE Digital Library,<br>myPHR.com | Included |
| <b>34</b> | HealthButler          | ACM Digital Library                                                                   | Included |
| <b>35</b> | Keas                  | ACM Digital Library,<br>myPHR.com                                                     | Included |
| <b>36</b> | dLife                 | ACM Digital Library,<br>myPHR.com                                                     | Included |
| <b>37</b> | iHealthRecord         | ACM Digital Library,<br>myPHR.com                                                     | Included |
| <b>38</b> | myMediConnect         | ACM Digital Library,<br>myPHR.com                                                     | Included |
| <b>39</b> | MedicAlert            | ScienceDirect,<br>ACM Digital Library,<br>myPHR.com                                   | Included |
| <b>40</b> | MedsFile.com          | ACM Digital Library,<br>myPHR.com                                                     | Included |
| <b>41</b> | Microsoft HealthVault | ScienceDirect,<br>Medline, ACM Digital Library,<br>IEEE Digital Library,<br>myPHR.com | Included |
| <b>42</b> | MyChart               | ScienceDirect,<br>Medline, ACM Digital Library,<br>myPHR.com                          | Included |
| <b>43</b> | myHealthFolders       | ScienceDirect,<br>ACM Digital Library,<br>myPHR.com                                   | Included |

|           |                     |                                               |          |
|-----------|---------------------|-----------------------------------------------|----------|
| <b>44</b> | NoMoreClipBoard.com | ACM Digital Library, myPHR.com                | Included |
| <b>45</b> | RememberItNow!      | ACM Digital Library, myPHR.com                | Included |
| <b>46</b> | Telemedical.com     | ScienceDirect, ACM Digital Library, myPHR.com | Included |
| <b>47</b> | Juniper Health      | ACM Digital Library, myPHR.com                | Included |
| <b>48</b> | My HealtheVet       | ScienceDirect, Medline                        | Included |
| <b>49</b> | ZebraHealth         | ACM Digital Library, myPHR.com                | Included |
| <b>50</b> | MediCompass         | ACM Digital Library, myPHR.com                | Included |
| <b>51</b> | PatientsLikeMe      | ScienceDirect, Medline, ACM Digital Library   | Included |
